# Supplementary material for: Buffer catalyzed cleavage of uridylyl-3′,5′-uridine in aqueous DMSO: comparison to its activated analog, 2-hydroxypropyl 4-nitrophenyl phosphate
Source: Royal Society of Chemistry journal article supplement (doi:10.1039/c4ob02682a), 2015-01-01
Supplement: c4ob02682a1.pdf [file c4ob02682a1.pdf]

Supporting Information for

## Buffer catalyzed cleavage of uridylyl-3',5'-uridine in aqueous DMSO: comparison to its activated analog, 2-hydroxypropyl 4-nitrophenyl phosphate

Luigi Lain, Harri Lönnberg and Tuomas Lönnberg\*

Department of Chemistry, University of Turku, FIN-20014 Turku, Finland

### Contents

|                                                                                                                                                          |    |
|----------------------------------------------------------------------------------------------------------------------------------------------------------|----|
| <b>Table S1</b> Observed rate constants for the cleavage and isomerization of UpU in morpholine buffers containing 80% (v/v) of DMSO.                    | S2 |
| <b>Figure S1</b> Rate constants for the cleavage and isomerization of UpU in morpholine buffers as a function of total buffer concentration.             | S2 |
| <b>Table S2</b> Observed rate constants for the cleavage and isomerization of UpU in 4-hydroxypiperidine buffers containing 80% (v/v) of DMSO.           | S3 |
| <b>Figure S2</b> Observed first-order rate constants for the cleavage of UpU in 4-hydroxypiperidine buffers as a function of total buffer concentration. | S3 |
| <b>Table S3</b> Observed rate constants for the cleavage and isomerization of UpU in piperidine buffers containing 80% (v/v) of DMSO.                    | S4 |
| <b>Figure S3</b> Observed first-order rate constants for the cleavage of UpU in piperidine buffers as a function of total buffer concentration.          | S4 |
| <b>Table S4</b> Observed rate constants for the cleavage of UpU in 1,3,5-trimethylphenol buffers containing 80% (v/v) of DMSO.                           | S5 |

**Table S1** Observed rate constants for the cleavage and isomerization of UpU in morpholine buffers containing 80% (v/v) of DMSO;  $T = 90\text{ }^{\circ}\text{C}$ ,  $I(\text{NaClO}_4) = 0.2\text{ mol L}^{-1}$ .

| $[\text{BH}^+]:[\text{B}]$ | [Buffer] / mol L <sup>-1</sup> | $k_{\text{obs}}^{\text{clv}} / 10^{-7}\text{ s}^{-1}$ | $k_{\text{obs}}^{\text{iso}} / 10^{-7}\text{ s}^{-1}$ |
|----------------------------|--------------------------------|-------------------------------------------------------|-------------------------------------------------------|
| 3:1                        | 0.01                           | 0.377                                                 | 4.38                                                  |
|                            | 0.10                           | 1.93                                                  | 7.53                                                  |
|                            | 0.15                           | 2.06                                                  | 6.55                                                  |
|                            | 0.20                           | 2.33                                                  | 8.03                                                  |
| 1:1                        | 0.01                           | 0.523                                                 | 4.25                                                  |
|                            | 0.10                           | 2.09                                                  | 7.10                                                  |
|                            | 0.15                           | 2.84                                                  | 6.75                                                  |
|                            | 0.20                           | 4.05                                                  | 8.50                                                  |
| 1:3                        | 0.01                           | 0.796                                                 | 4.58                                                  |
|                            | 0.05                           | 0.722                                                 | 4.68                                                  |
|                            | 0.10                           | 1.11                                                  | 5.20                                                  |
|                            | 0.15                           | 1.59                                                  | 5.51                                                  |
|                            | 0.20                           | 2.13                                                  | 6.15                                                  |

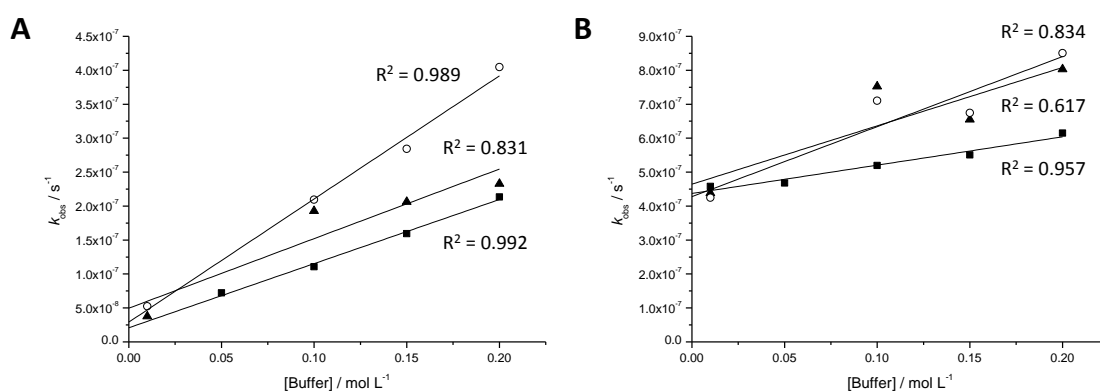

**Figure S1** Rate constants for the cleavage (A,  $k_{\text{obs}}^{\text{clv}}$ ) and isomerization (B,  $k_{\text{obs}}^{\text{iso}}$ ) of UpU in morpholine buffers as a function of total buffer concentration at  $[\text{BH}^+]:[\text{B}] = 3:1$  ( $\blacktriangle$ ),  $1:1$  ( $\circ$ ) and  $1:3$  ( $\blacksquare$ );  $T = 90\text{ }^{\circ}\text{C}$ ;  $I(\text{NaClO}_4) = 0.2\text{ mol L}^{-1}$ .

**Table S2** Observed rate constants for the cleavage and isomerization of UpU in 4-hydroxypiperidine buffers containing 80% (v/v) of DMSO;  $T = 90\text{ }^{\circ}\text{C}$ ,  $I(\text{NaClO}_4) = 0.2\text{ mol L}^{-1}$ .

| $[\text{BH}^+]:[\text{B}]$ | [Buffer] / $\text{mol L}^{-1}$ | $k_{\text{obs}}^{\text{clv}} / 10^{-7}\text{ s}^{-1}$ | $k_{\text{obs}}^{\text{iso}} / 10^{-7}\text{ s}^{-1}$ |
|----------------------------|--------------------------------|-------------------------------------------------------|-------------------------------------------------------|
| 3:1                        | 0.01                           | 0.796                                                 | 4.42                                                  |
|                            | 0.05                           | 1.04                                                  | 4.64                                                  |
|                            | 0.10                           | 1.93                                                  | 5.44                                                  |
|                            | 0.15                           | 3.18                                                  | 5.46                                                  |
|                            | 0.20                           | 3.19                                                  | 6.18                                                  |
| 1:1                        | 0.01                           | 1.92                                                  | 4.34                                                  |
|                            | 0.05                           | 2.60                                                  | 4.44                                                  |
|                            | 0.10                           | 3.43                                                  | 4.14                                                  |
|                            | 0.15                           | 4.69                                                  | 4.56                                                  |
|                            | 0.20                           | 4.96                                                  | 4.76                                                  |
| 1:3                        | 0.01                           | 1.82                                                  | 3.74                                                  |
|                            | 0.05                           | 3.42                                                  | 3.76                                                  |
|                            | 0.10                           | 5.10                                                  | 3.94                                                  |
|                            | 0.15                           | 6.67                                                  | 4.54                                                  |
|                            | 0.20                           | 7.34                                                  | 4.28                                                  |

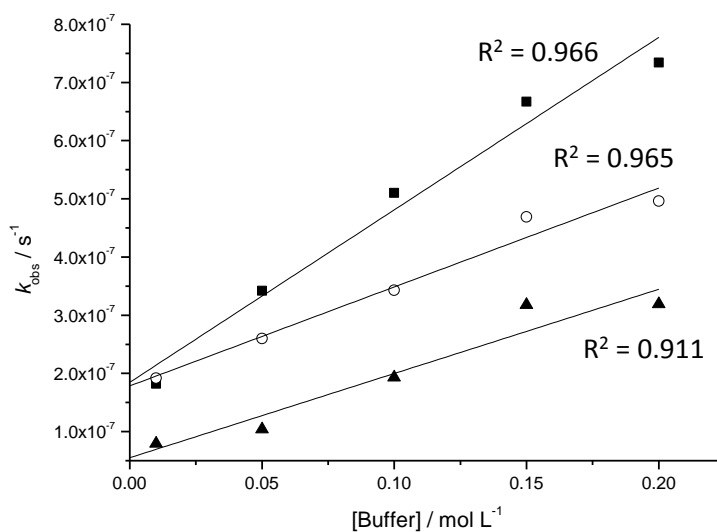

**Figure S2** Observed first-order rate constants for the cleavage of UpU ( $k_{\text{obs}}^{\text{clv}}$ ) in 4-hydroxypiperidine buffers as a function of total buffer concentration at  $[\text{BH}^+]:[\text{B}] = 3:1$  ( $\blacktriangle$ ),  $1:1$  ( $\circ$ ) and  $1:3$  ( $\blacksquare$ );  $T = 90\text{ }^{\circ}\text{C}$ ;  $I(\text{NaClO}_4) = 0.2\text{ mol L}^{-1}$ .

**Table S3** Observed rate constants for the cleavage and isomerization of UpU in piperidine buffers containing 80% (v/v) of DMSO;  $T = 90\text{ }^{\circ}\text{C}$ ,  $I(\text{NaClO}_4) = 0.2\text{ mol L}^{-1}$ .

| $[\text{BH}^+]:[\text{B}]$ | [Buffer] / $\text{mol L}^{-1}$ | $k_{\text{obs}}^{\text{clv}} / 10^{-7}\text{ s}^{-1}$ | $k_{\text{obs}}^{\text{iso}} / 10^{-7}\text{ s}^{-1}$ |
|----------------------------|--------------------------------|-------------------------------------------------------|-------------------------------------------------------|
| 3:1                        | 0.01                           | 0.229                                                 | 4.38                                                  |
|                            | 0.05                           | 0.546                                                 | 4.42                                                  |
|                            | 0.10                           | 0.765                                                 | 4.38                                                  |
|                            | 0.15                           | 0.898                                                 | 4.96                                                  |
|                            | 0.20                           | 1.17                                                  | 4.82                                                  |
| 1:1                        | 0.01                           | 0.299                                                 | 4.02                                                  |
|                            | 0.10                           | 1.08                                                  | 4.16                                                  |
|                            | 0.15                           | 1.24                                                  | 4.54                                                  |
|                            | 0.20                           | 1.87                                                  | 5.00                                                  |
| 1:3                        | 0.01                           | 0.735                                                 | 4.08                                                  |
|                            | 0.05                           | 1.30                                                  | 3.96                                                  |
|                            | 0.10                           | 1.78                                                  | 4.48                                                  |
|                            | 0.15                           | 2.40                                                  | 4.58                                                  |
|                            | 0.20                           | 2.43                                                  | 4.82                                                  |

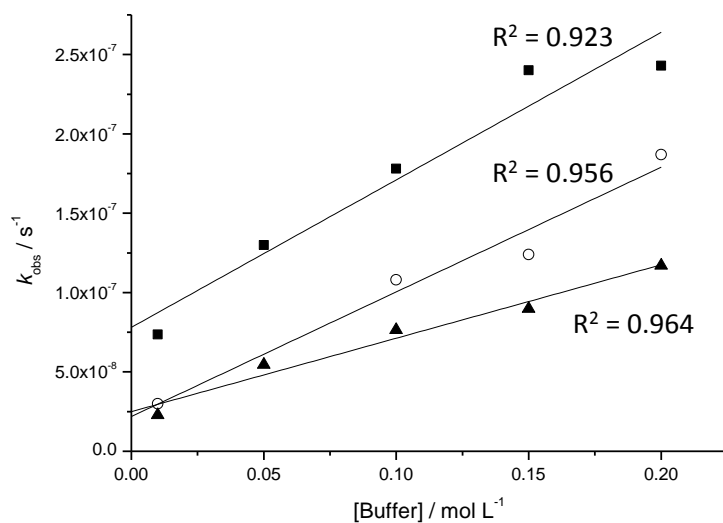

**Figure S3** Observed first-order rate constants for the cleavage of UpU ( $k_{\text{obs}}^{\text{clv}}$ ) in piperidine buffers as a function of total buffer concentration at  $[\text{BH}^+]:[\text{B}] = 3:1$  ( $\blacktriangle$ ),  $1:1$  ( $\circ$ ) and  $1:3$  ( $\blacksquare$ );  $T = 90\text{ }^{\circ}\text{C}$ ;  $I(\text{NaClO}_4) = 0.2\text{ mol L}^{-1}$ .

**Table S4** Observed rate constants for the cleavage of UpU in 1,3,5-trimethylphenol buffers containing 80% (v/v) of DMSO;  $T = 90\text{ }^{\circ}\text{C}$ ,  $I(\text{NaClO}_4) = 0.2\text{ mol L}^{-1}$ .

| $[\text{BH}^+]:[\text{B}]$ | [Buffer] / mol L <sup>-1</sup> | $k_{\text{obs}}^{\text{clv}} / 10^{-4}\text{ s}^{-1}$ |
|----------------------------|--------------------------------|-------------------------------------------------------|
| 3:1                        | 0.01                           | 2.31                                                  |
|                            | 0.03                           | 9.21                                                  |
|                            | 0.05                           | 8.81                                                  |
|                            | 0.07                           | 9.61                                                  |
|                            | 0.10                           | 11.5                                                  |
| 1:1                        | 0.01                           | 16.4                                                  |
|                            | 0.015                          | 15.0                                                  |
|                            | 0.025                          | 24.0                                                  |
|                            | 0.05                           | 27.0                                                  |
|                            | 0.075                          | 28.1                                                  |
| 1:3                        | 0.10                           | 30.8                                                  |
|                            | 0.01                           | 21.8                                                  |
|                            | 0.02                           | 41.0                                                  |
|                            | 0.03                           | 48.4                                                  |
|                            | 0.04                           | 68.6                                                  |
|                            | 0.05                           | 61.1                                                  |
